# Supplementary material for: Ring lithiation of 1,8-bis(dimethylamino)naphthalene: another side of the ‘proton sponge coin’
Source: Royal Society of Chemistry journal article supplement (doi:10.1039/c5dt02482j), 2015-01-01
Supplement: c5dt02482j1.pdf [file c5dt02482j1.pdf]

## Ring lithiation of 1,8-bis(dimethylamino)naphthalene: another side of the ‘proton sponge coin’

Alexander S. Antonov,<sup>†</sup> Alexander F. Pozharskii,<sup>\*,†</sup> Valery A. Ozeryanskii,<sup>†</sup> Aleksander Filarowski,<sup>‡</sup>

Kyrill Yu. Suponitsky,<sup>§</sup> Peter M. Tolstoy,<sup>†</sup> and Mikhail A. Vovk<sup>†</sup>

<sup>†</sup> Department of Organic Chemistry, Southern Federal University, Zorge str. 7, 344090 Rostov-on-Don, Russian Federation

<sup>‡</sup> Faculty of Chemistry, University of Wrocław, F. Joliot-Curie 14, 50-383 Wrocław, Poland, and Frank Laboratory of Neutron Physics, JINR, 141980 Dubna, Russia.

<sup>§</sup> Nesmeyanov Institute of Organoelement Compounds, Russian Academy of Sciences, Vavilov str. 28, 119991 Moscow, Russian Federation

<sup>†</sup> Department of Chemistry, St. Petersburg State University, Universitetskii pr. 26, 198504 St. Petersburg, Russian Federation

### Supporting Information

|                                                                                                                                            |     |
|--------------------------------------------------------------------------------------------------------------------------------------------|-----|
| SI-1. Crystal data and structure refinement for ( <b>5a</b> ·Et <sub>2</sub> O) <sub>2</sub>                                               | S-2 |
| SI-2. Some quantum-chemical characteristics of structures <b>1</b> , <b>5a–d</b> and their ligated complexes [B3LYP/6-311G+(d,p)]          | S-3 |
| SI-3. Relative energies of complexes <b>5a–d</b> with TMEDA [B3LYP/6-311G+(d,p)]                                                           | S-4 |
| SI-4. <sup>1</sup> H and <sup>13</sup> C NMR spectra for new products                                                                      | S-5 |
| SI-5. Thermochemical data and Cartesian Coordinates for structures <b>1</b> , <b>5a–d</b> and their ligated complexes [B3LYP/6-311G+(d,p)] | S-8 |

**SI-1. Crystal data and structure refinement for (5a·Et<sub>2</sub>O)<sub>2</sub>**

| Parameter                                                                             | Data                                               |
|---------------------------------------------------------------------------------------|----------------------------------------------------|
| Empirical formula                                                                     | C <sub>18</sub> H <sub>27</sub> LiN <sub>2</sub> O |
| Formula weight                                                                        | 294.36                                             |
| Crystal system                                                                        | Monoclinic                                         |
| Space group                                                                           | <i>P</i> 2 <sub>1</sub> / <i>c</i>                 |
| <i>a</i> (Å)                                                                          | 8.847(4)                                           |
| <i>b</i> (Å)                                                                          | 23.449(9)                                          |
| <i>c</i> (Å)                                                                          | 8.877(4)                                           |
| $\alpha$ (°)                                                                          | 90                                                 |
| $\beta$ (°)                                                                           | 108.188(6)                                         |
| $\gamma$ (°)                                                                          | 90                                                 |
| <i>V</i> (Å <sup>3</sup> )                                                            | 1749.4(12)                                         |
| <i>Z</i>                                                                              | 4                                                  |
| <i>d</i> <sub>calc</sub> , g·cm <sup>-3</sup>                                         | 1.118                                              |
| $\mu$ (mm <sup>-1</sup> )                                                             | 0.068                                              |
| <i>F</i> (000)                                                                        | 640                                                |
| $\theta$ range, deg.                                                                  | 2.42 – 26.00                                       |
| Reflections collected/unique                                                          | 10889/3424                                         |
| <i>R</i> (int)                                                                        | 0.2432                                             |
| Refined parameters                                                                    | 205                                                |
| Completeness to theta $\theta$ , %                                                    | 99.9                                               |
| <i>GOF</i> ( <i>F</i> <sup>2</sup> )                                                  | 0.968                                              |
| Reflections with <i>I</i> > 2 $\sigma$ ( <i>I</i> )                                   | 1266                                               |
| <i>R</i> <sub>1</sub> ( <i>F</i> ) ( <i>I</i> > 2 $\sigma$ ( <i>I</i> )) <sup>a</sup> | 0.0847                                             |
| <i>wR</i> <sub>2</sub> ( <i>F</i> <sup>2</sup> ) (all data) <sup>b</sup>              | 0.1820                                             |
| Largest diff. peak/hole, e·Å <sup>-3</sup>                                            | 0.275/–0.242                                       |

<sup>a</sup>  $R_1 = \sum |F_o - |F_c|| / \sum (F_o)$ ; <sup>b</sup>  $wR_2 = (\sum [w(F_o^2 - F_c^2)^2] / \sum [w(F_o^2)^2])^{1/2}$

SI-2. Some quantum-chemical characteristics of structures 1, 5a–d (and their complexes with TMEDA) and 5a complex with THF [B3LYP/6-311G+(d,p)]

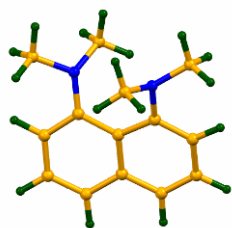

**1**

$E = -653.975466$  a.u.

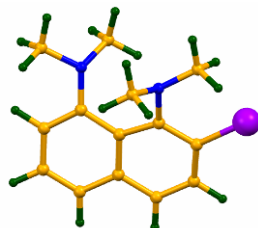

**5a(in,in)**

$E = -660.873233$  a.u.  
C...Li = 1.954 Å

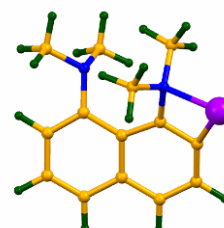

**5a(in,out)**

$E = -660.880958$  a.u.  
C...Li = 1.934 Å

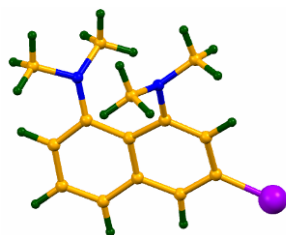

**5b**

$E = -660.867354$  a.u.  
C...Li = 1.959 Å

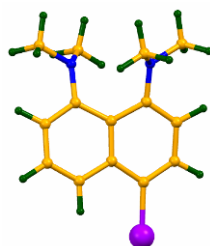

**5c**

$E = -660.867941$  a.u.  
C...Li = 1.959 Å

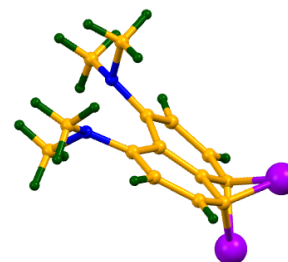

**5d**

$E = -667.802743$  a.u.  
C...Li = 2.025(9) Å

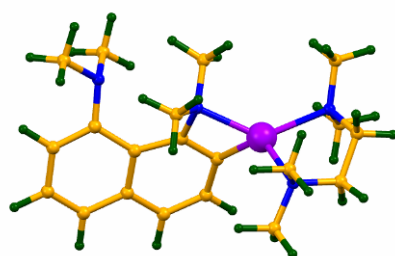

**5a·TMEDA**

$E = -1008.765508$  a.u.  
C...Li = 2.029 Å

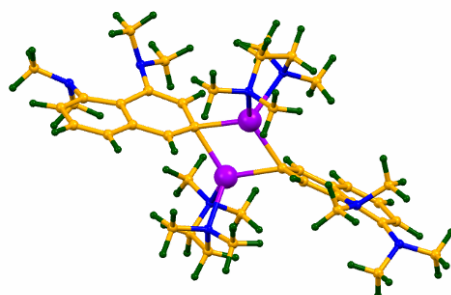

**(5b·TMEDA)<sub>2</sub>**

$E = -2017.559526$  a.u.  
C...Li = 2.233(41)/2.240(9) Å

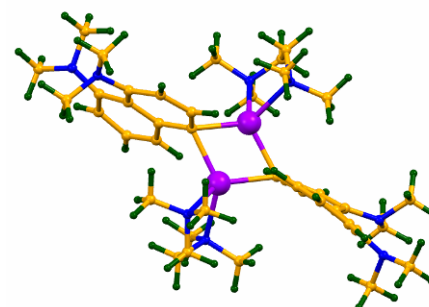

**(5c·TMEDA)<sub>2</sub>**

$E = -2017.560870$  a.u.  
C...Li = 2.226(49)/2.230(57) Å

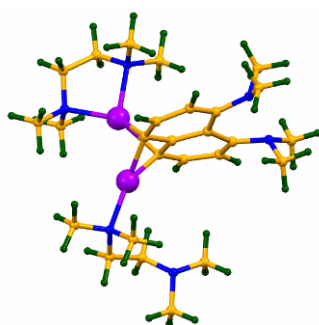

**5d·(TMEDA)<sub>2</sub>**

$E = -1363.559376$  a.u.  
C...Li = 2.058(67)/2.150(7) Å

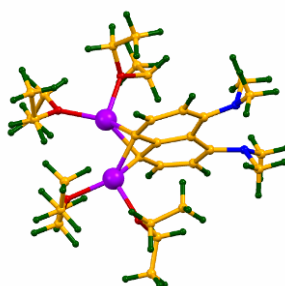

**5d·(Et<sub>2</sub>O)<sub>4</sub>**

$E = -1602.802528$  a.u.  
C...Li = 2.118(60)/2.148(91) Å

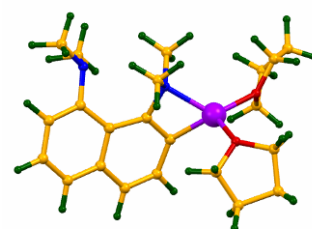

**11c ≡ 5a·THF<sub>2</sub>**

$E = -1125.961892$  a.u.  
C...Li = 2.051 Å

SI-3. Relative energies of complexes **5a-d** with TMEDA [B3LYP/6-311G+(d,p)]

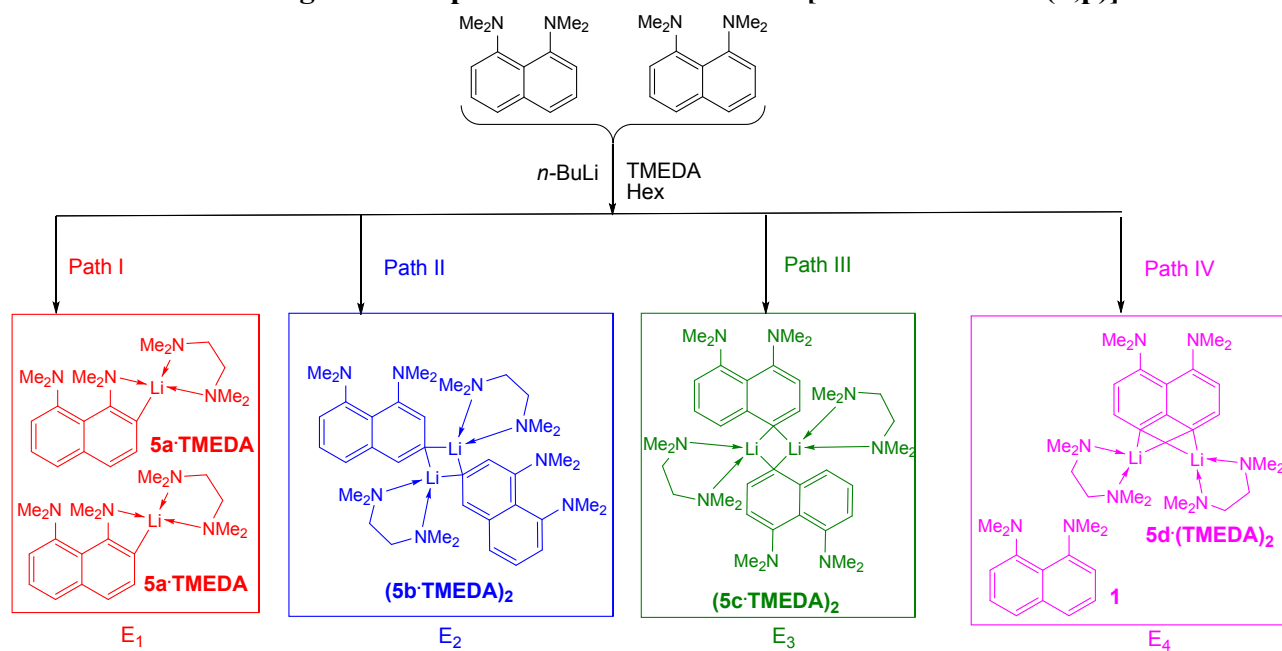

$$E_1 = 2E[5a \cdot \text{TMEDA}] = -2017.531016 \text{ a.u.}$$

$$E_2 = E[(5b \cdot \text{TMEDA})_2] = -2017.559526 \text{ a.u.}$$

$$E_3 = E[(5c \cdot \text{TMEDA})_2] = -2017.560870 \text{ a.u.}$$

$$E_4 = E[5d \cdot (\text{TMEDA})_2] + E[1] = -2017.534842 \text{ a.u.}$$

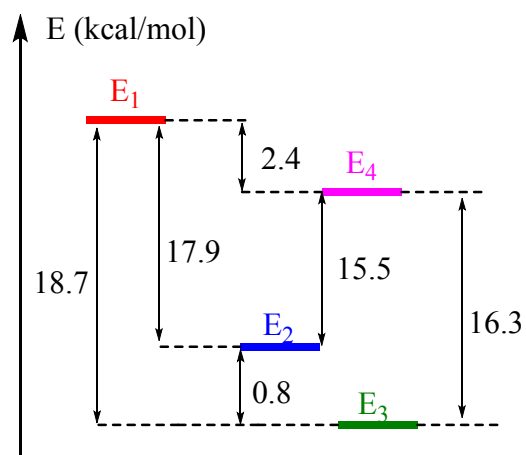

# SI-4. <sup>1</sup>H and <sup>13</sup>C NMR spectra for new products

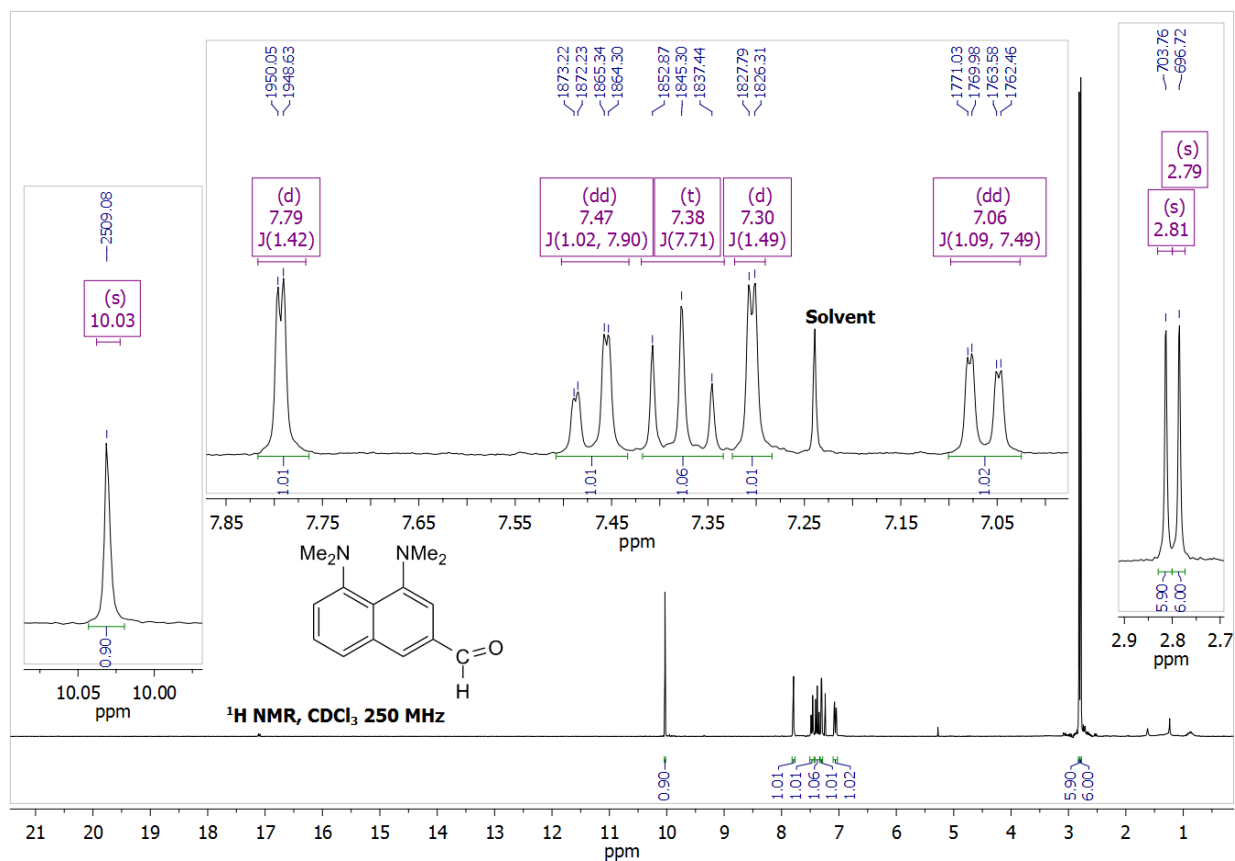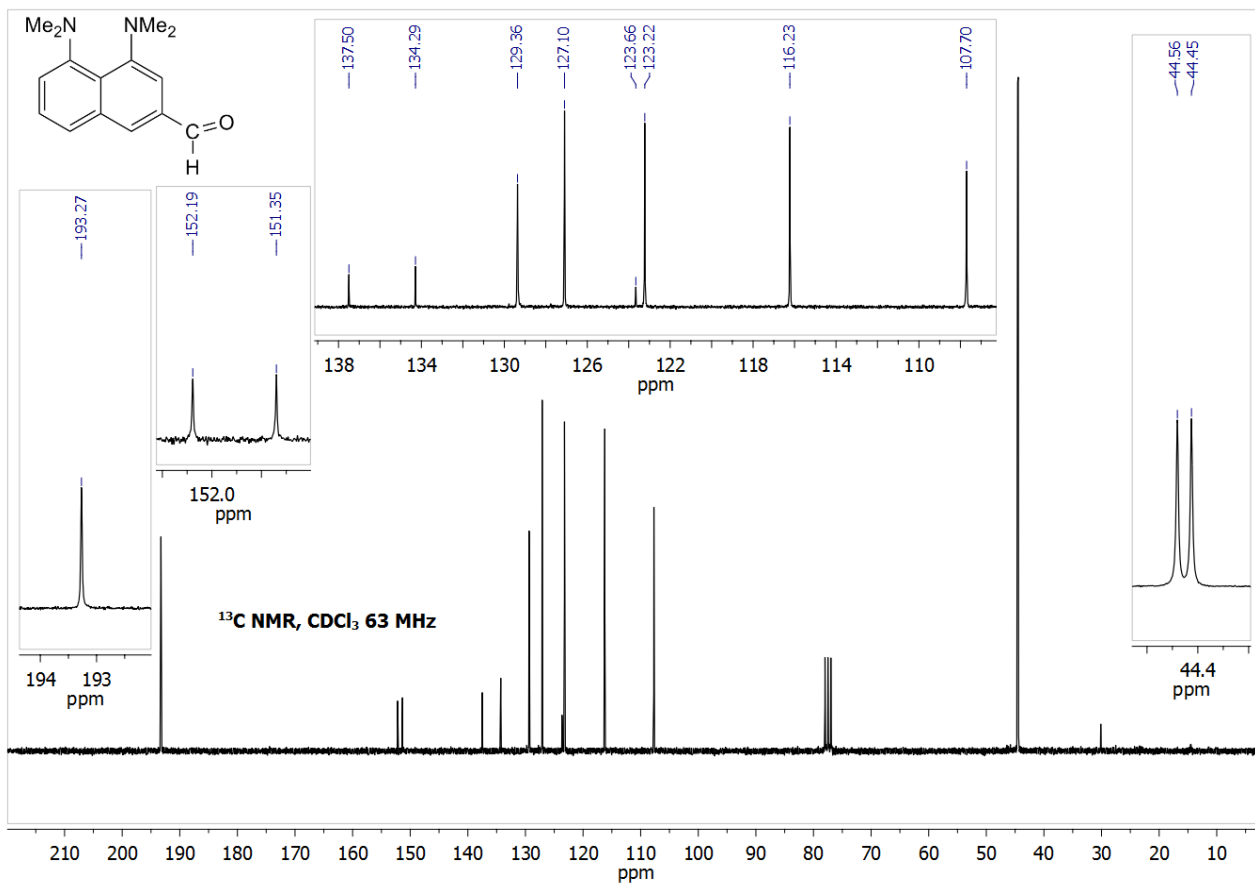

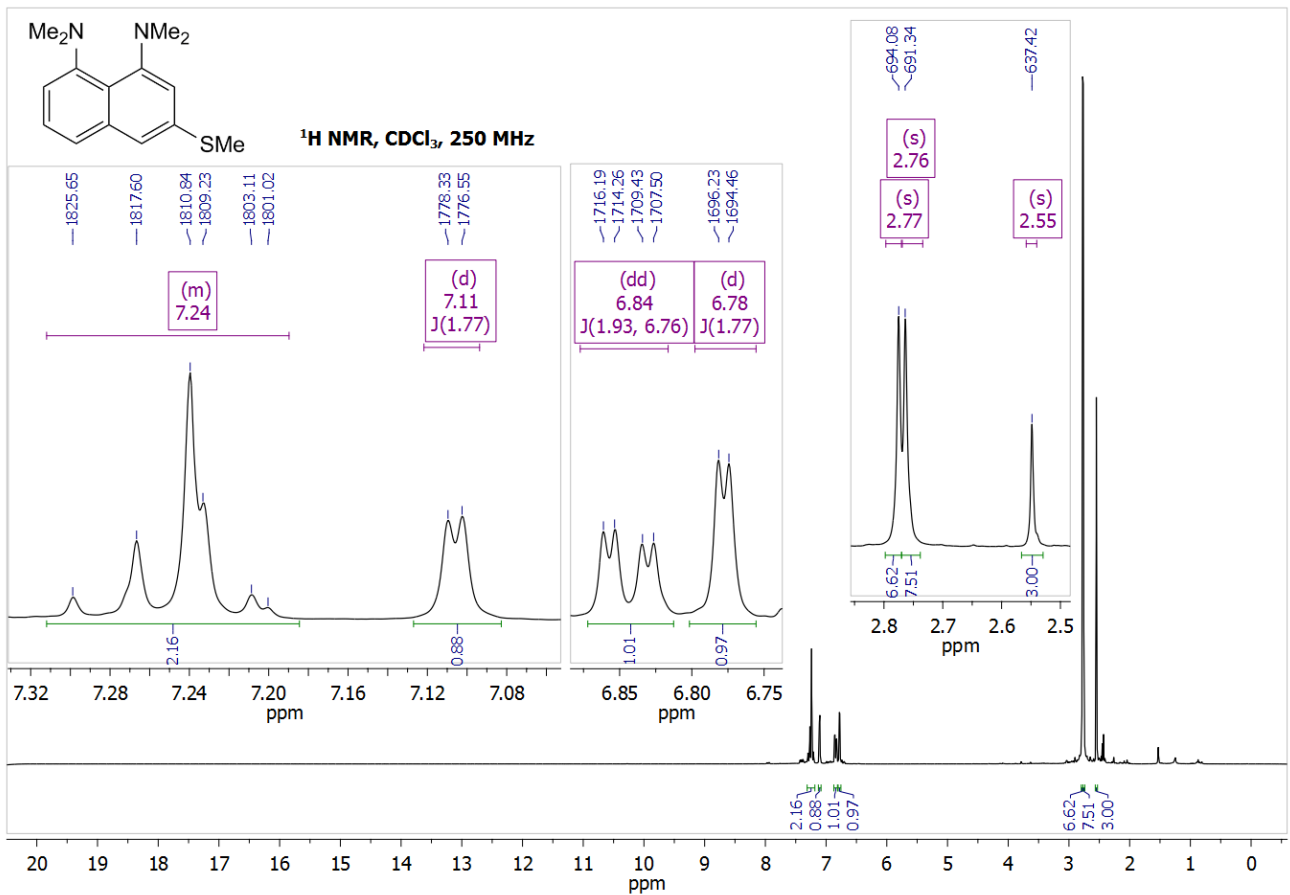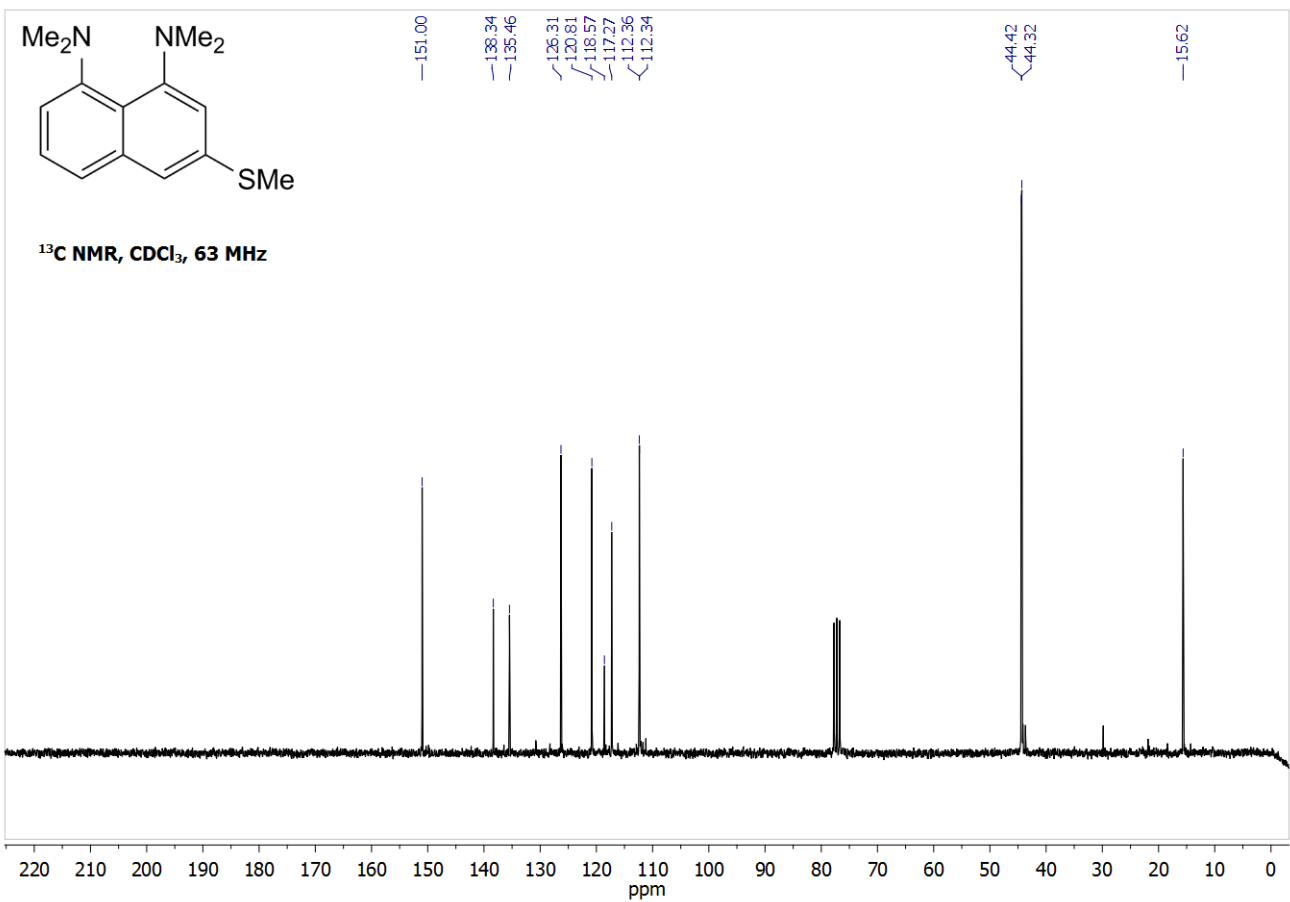

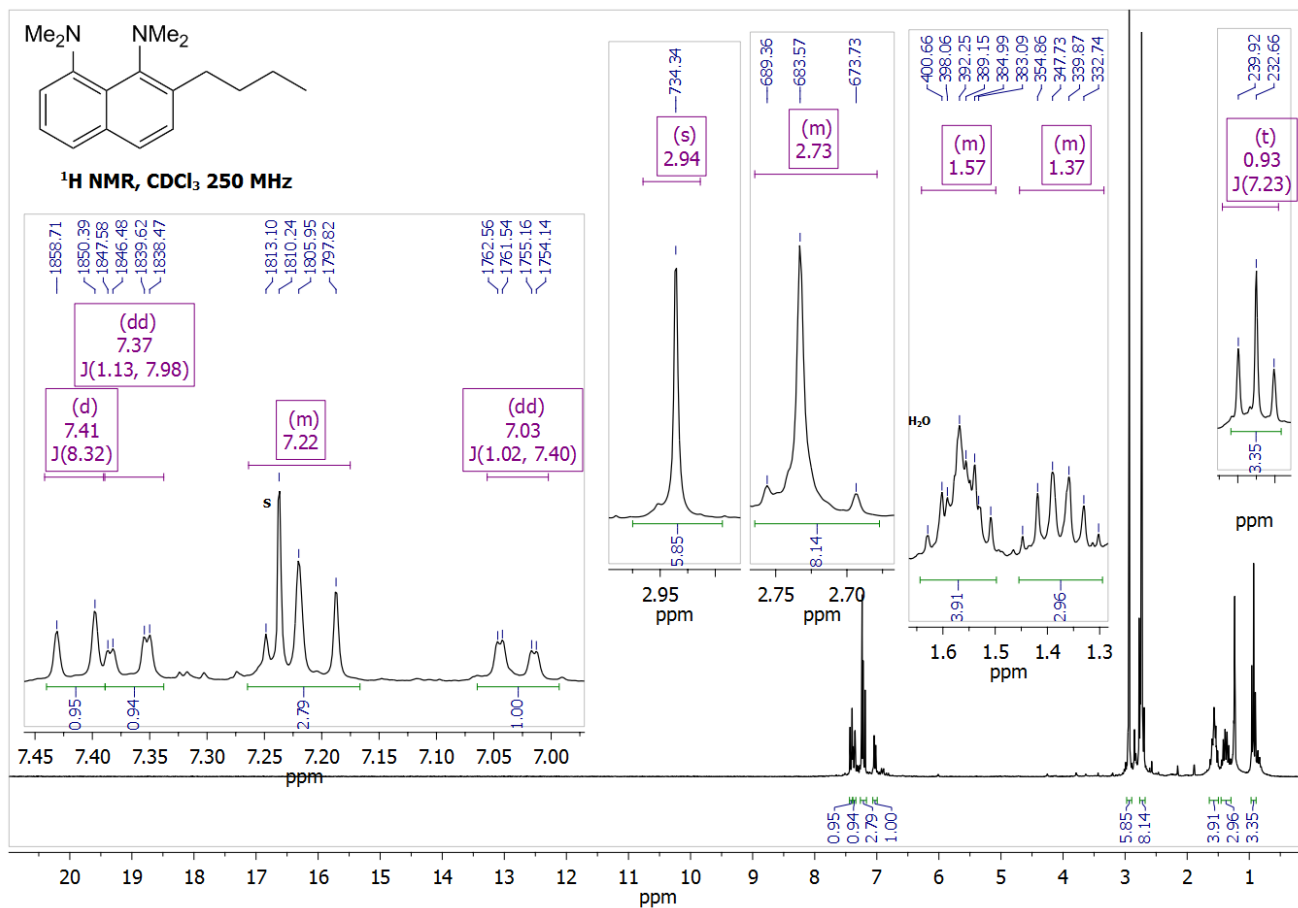

SI-5. Thermochemical data and Cartesian Coordinates for structures 1, 5a–d and their ligated complexes [B3LYP/6-311G+(d,p)]

Compound 1

|                                              |                             |
|----------------------------------------------|-----------------------------|
| Zero-point correction=                       | 0.291866 (Hartree/Particle) |
| Thermal correction to Energy=                | 0.306876                    |
| Thermal correction to Enthalpy=              | 0.307820                    |
| Thermal correction to Gibbs Free Energy=     | 0.251106                    |
| Sum of electronic and zero-point Energies=   | -653.683600                 |
| Sum of electronic and thermal Energies=      | -653.668590                 |
| Sum of electronic and thermal Enthalpies=    | -653.667646                 |
| Sum of electronic and thermal Free Energies= | -653.724360                 |

HF=-653.9754662

|   |           |           |           |
|---|-----------|-----------|-----------|
| C | -0.059163 | 0.175678  | 0.014126  |
| C | -0.087583 | -0.031127 | 1.418262  |
| C | 1.136113  | -0.072803 | 2.173786  |
| C | 2.375603  | -0.123100 | 1.421557  |
| C | 2.343028  | 0.112249  | 0.053545  |
| C | 1.134856  | 0.296346  | -0.644537 |
| C | 1.020411  | -0.060804 | 3.619878  |
| C | -0.227753 | -0.252621 | 4.197168  |
| C | -1.400192 | -0.355619 | 3.425389  |
| C | -1.339356 | -0.196285 | 2.067076  |
| N | 2.151412  | 0.162218  | 4.437022  |
| C | 2.067417  | -0.220035 | 5.835856  |
| N | 3.599916  | -0.426369 | 2.058702  |
| C | 3.685413  | -1.740932 | 2.694382  |
| C | 4.830763  | -0.083158 | 1.367893  |
| C | 2.822959  | 1.450601  | 4.268148  |
| H | 5.056072  | -0.739680 | 0.509453  |
| H | 4.794155  | 0.948761  | 1.014207  |
| H | 5.660399  | -0.172375 | 2.074291  |
| H | 4.462652  | -1.729666 | 3.463547  |
| H | 2.743450  | -2.000229 | 3.168244  |
| H | 3.934003  | -2.523485 | 1.957833  |
| H | 2.836123  | 1.742515  | 3.222356  |
| H | 3.857395  | 1.376679  | 4.615001  |
| H | 2.316290  | 2.241813  | 4.846049  |
| H | 3.073542  | -0.193562 | 6.262814  |
| H | 1.433841  | 0.450605  | 6.442090  |
| H | 1.684070  | -1.237571 | 5.930450  |
| H | -0.320902 | -0.262525 | 5.274509  |
| H | -2.353020 | -0.500372 | 3.922763  |



|   |           |           |           |
|---|-----------|-----------|-----------|
| H | -2.240468 | -0.197146 | 1.463959  |
| H | -1.000490 | 0.239263  | -0.520299 |
| H | 1.160598  | 0.472691  | -1.714328 |
| H | 3.264275  | 0.093977  | -0.512486 |

Compound **5a(in,in)**

|                                              |                             |
|----------------------------------------------|-----------------------------|
| Zero-point correction=                       | 0.280274 (Hartree/Particle) |
| Thermal correction to Energy=                | 0.296379                    |
| Thermal correction to Enthalpy=              | 0.297323                    |
| Thermal correction to Gibbs Free Energy=     | 0.238401                    |
| Sum of electronic and zero-point Energies=   | -660.592960                 |
| Sum of electronic and thermal Energies=      | -660.576854                 |
| Sum of electronic and thermal Enthalpies=    | -660.575910                 |
| Sum of electronic and thermal Free Energies= | -660.634832                 |

HF=-660.8732332

|   |           |           |           |
|---|-----------|-----------|-----------|
| C | -0.045569 | -0.019451 | 0.079060  |
| C | -0.020483 | 0.078311  | 1.463502  |
| C | 1.185950  | 0.185116  | 2.182875  |
| C | 2.380947  | 0.121854  | 1.517389  |
| C | 2.413518  | 0.044048  | 0.100454  |
| C | 1.196616  | 0.082905  | -0.664265 |
| C | 1.346525  | 0.220498  | -2.100074 |
| C | 2.563697  | 0.051512  | -2.761833 |
| C | 3.707011  | -0.153358 | -1.936755 |
| C | 3.657830  | -0.080569 | -0.567780 |
| N | 0.179067  | 0.589383  | -2.863871 |
| N | -1.276868 | -0.235975 | -0.591510 |
| C | 0.203288  | 0.354508  | -4.276344 |
| C | -1.376036 | -1.486724 | -1.339795 |
| C | -2.503268 | 0.053782  | 0.128686  |
| C | -0.383205 | 1.901593  | -2.557231 |
| H | 0.831640  | 1.089447  | -4.859595 |
| H | 0.529853  | -0.670111 | -4.490432 |
| H | -0.800592 | 0.478266  | -4.692878 |
| H | -1.407642 | 1.968243  | -2.936172 |
| H | -0.408076 | 2.059594  | -1.483115 |
| H | 0.213978  | 2.712288  | -3.013921 |
| H | -0.438420 | -1.704876 | -1.843597 |
| H | -2.162956 | -1.404002 | -2.095761 |
| H | -1.620314 | -2.334072 | -0.675774 |
| H | -3.333930 | 0.047158  | -0.582936 |
| H | -2.740786 | -0.680671 | 0.919032  |
| H | -2.452377 | 1.044579  | 0.584121  |

|    |           |           |           |
|----|-----------|-----------|-----------|
| H  | -0.945460 | 0.016590  | 2.020981  |
| H  | 1.156664  | 0.259391  | 3.264699  |
| H  | 3.321475  | 0.129943  | 2.058005  |
| H  | 4.562038  | -0.135377 | 0.032259  |
| H  | 4.678839  | -0.312921 | -2.402918 |
| Li | 2.522721  | 0.185461  | -4.710766 |

Compound **5a(in,out)**

|                                              |                             |
|----------------------------------------------|-----------------------------|
| Zero-point correction=                       | 0.281055 (Hartree/Particle) |
| Thermal correction to Energy=                | 0.297050                    |
| Thermal correction to Enthalpy=              | 0.297994                    |
| Thermal correction to Gibbs Free Energy=     | 0.239460                    |
| Sum of electronic and zero-point Energies=   | -660.599903                 |
| Sum of electronic and thermal Energies=      | -660.583908                 |
| Sum of electronic and thermal Enthalpies=    | -660.582964                 |
| Sum of electronic and thermal Free Energies= | -660.641498                 |

HF=-660.8809581

|    |           |           |           |
|----|-----------|-----------|-----------|
| C  | 0.042411  | 0.105067  | 0.018796  |
| C  | 0.023328  | 0.045746  | 1.437693  |
| C  | 1.262753  | 0.053532  | 2.174424  |
| C  | 2.458242  | -0.151605 | 1.380958  |
| C  | 2.467976  | -0.099690 | -0.006943 |
| C  | 1.230538  | 0.126604  | -0.665652 |
| C  | 1.155674  | 0.252602  | 3.597738  |
| C  | -0.075685 | 0.161700  | 4.223398  |
| C  | -1.266253 | -0.018123 | 3.492342  |
| C  | -1.217439 | -0.017296 | 2.122469  |
| N  | 2.314468  | 0.657962  | 4.344384  |
| C  | 2.345135  | 0.281370  | 5.753030  |
| N  | 3.755706  | -0.643512 | 1.937178  |
| C  | 3.662611  | -1.795673 | 2.842698  |
| C  | 4.738925  | 0.348575  | 2.401328  |
| C  | 2.569877  | 2.095652  | 4.185520  |
| Li | 4.200795  | -0.958046 | 0.020926  |
| H  | 4.720203  | 1.213751  | 1.735465  |
| H  | 4.551112  | 0.683095  | 3.424034  |
| H  | 5.743037  | -0.093988 | 2.369188  |
| H  | 4.647207  | -2.271255 | 2.922233  |
| H  | 3.336714  | -1.518735 | 3.849480  |
| H  | 2.958827  | -2.522992 | 2.433103  |
| H  | 2.592124  | 2.358991  | 3.128198  |
| H  | 3.536860  | 2.351867  | 4.628562  |
| H  | 1.793673  | 2.704935  | 4.677289  |

|   |           |           |           |
|---|-----------|-----------|-----------|
| H | 3.352151  | 0.457752  | 6.143158  |
| H | 1.644719  | 0.855626  | 6.382605  |
| H | 2.114413  | -0.779649 | 5.863786  |
| H | -0.140856 | 0.288379  | 5.296861  |
| H | -2.213617 | -0.090435 | 4.015098  |
| H | -2.128601 | -0.068304 | 1.535480  |
| H | -0.909887 | 0.135830  | -0.504349 |
| H | 1.209670  | 0.231116  | -1.748576 |

Compound **5b**

|                                              |                             |
|----------------------------------------------|-----------------------------|
| Zero-point correction=                       | 0.280406 (Hartree/Particle) |
| Thermal correction to Energy=                | 0.296948                    |
| Thermal correction to Enthalpy=              | 0.297892                    |
| Thermal correction to Gibbs Free Energy=     | 0.237623                    |
| Sum of electronic and zero-point Energies=   | -660.586948                 |
| Sum of electronic and thermal Energies=      | -660.570405                 |
| Sum of electronic and thermal Enthalpies=    | -660.569461                 |
| Sum of electronic and thermal Free Energies= | -660.629731                 |

HF=-660.8673537

|   |           |           |           |
|---|-----------|-----------|-----------|
| C | -0.067000 | -0.008284 | 0.090499  |
| C | -0.021115 | 0.062237  | 1.475890  |
| C | 1.197361  | 0.137884  | 2.178916  |
| C | 2.381599  | 0.074832  | 1.495046  |
| C | 2.397675  | 0.028917  | 0.075069  |
| C | 1.166755  | 0.090560  | -0.664357 |
| C | 1.290328  | 0.243966  | -2.097876 |
| C | 2.540427  | 0.108663  | -2.688785 |
| C | 3.769385  | -0.088918 | -1.988931 |
| C | 3.641783  | -0.072665 | -0.608137 |
| N | 0.148495  | 0.555823  | -2.889654 |
| N | -1.309482 | -0.198081 | -0.566106 |
| C | 0.213207  | 0.281523  | -4.312835 |
| C | -1.443480 | -1.446513 | -1.313737 |
| C | -2.520571 | 0.114714  | 0.170470  |
| C | -0.455081 | 1.859156  | -2.624723 |
| H | 0.851520  | 0.985564  | -4.877381 |
| H | 0.581854  | -0.730910 | -4.488447 |
| H | -0.797033 | 0.355243  | -4.727104 |
| H | -1.475798 | 1.880263  | -3.018686 |
| H | -0.501690 | 2.047899  | -1.555712 |
| H | 0.118176  | 2.674940  | -3.100451 |
| H | -0.522710 | -1.675944 | -1.841799 |
| H | -2.245135 | -1.350359 | -2.051808 |

|    |           |           |           |
|----|-----------|-----------|-----------|
| H  | -1.685620 | -2.290364 | -0.644055 |
| H  | -3.358606 | 0.131873  | -0.532147 |
| H  | -2.766504 | -0.619883 | 0.958348  |
| H  | -2.441476 | 1.100847  | 0.631846  |
| H  | -0.939220 | 0.000787  | 2.044544  |
| H  | 1.184396  | 0.190872  | 3.262577  |
| H  | 3.329713  | 0.065139  | 2.022946  |
| H  | 4.520512  | -0.139149 | 0.036053  |
| Li | 5.546661  | -0.295627 | -2.785502 |
| H  | 2.580081  | 0.209682  | -3.768985 |

### Compound 5c

|                                              |                             |
|----------------------------------------------|-----------------------------|
| Zero-point correction=                       | 0.280102 (Hartree/Particle) |
| Thermal correction to Energy=                | 0.296711                    |
| Thermal correction to Enthalpy=              | 0.297655                    |
| Thermal correction to Gibbs Free Energy=     | 0.237140                    |
| Sum of electronic and zero-point Energies=   | -660.587839                 |
| Sum of electronic and thermal Energies=      | -660.571230                 |
| Sum of electronic and thermal Enthalpies=    | -660.570286                 |
| Sum of electronic and thermal Free Energies= | -660.630801                 |

HF=-660.8679409

|   |           |           |           |
|---|-----------|-----------|-----------|
| C | -0.058552 | -0.005325 | 0.074510  |
| C | -0.020641 | 0.106251  | 1.457452  |
| C | 1.196484  | 0.209249  | 2.156223  |
| C | 2.377849  | 0.116965  | 1.469397  |
| C | 2.423624  | 0.018426  | 0.050031  |
| C | 1.177548  | 0.083624  | -0.680214 |
| C | 1.270588  | 0.238967  | -2.116096 |
| C | 2.506530  | 0.075425  | -2.718527 |
| C | 3.678583  | -0.162861 | -1.968826 |
| C | 3.708254  | -0.140782 | -0.584053 |
| N | 0.130923  | 0.579049  | -2.893524 |
| N | -1.296106 | -0.222087 | -0.580455 |
| C | 0.189632  | 0.329001  | -4.321657 |
| C | -1.410613 | -1.468818 | -1.333532 |
| C | -2.514432 | 0.076063  | 0.149086  |
| C | -0.464238 | 1.880481  | -2.600754 |
| H | 0.843501  | 1.029389  | -4.872158 |
| H | 0.536624  | -0.687846 | -4.515334 |
| H | -0.818223 | 0.431377  | -4.734656 |
| H | -1.489416 | 1.911149  | -2.981871 |
| H | -0.496815 | 2.053722  | -1.528546 |

|    |           |           |           |
|----|-----------|-----------|-----------|
| H  | 0.106120  | 2.701246  | -3.070600 |
| H  | -0.480794 | -1.691367 | -1.848494 |
| H  | -2.202291 | -1.376680 | -2.082664 |
| H  | -1.655759 | -2.316134 | -0.669447 |
| H  | -3.351451 | 0.067709  | -0.554767 |
| H  | -2.746762 | -0.653115 | 0.946161  |
| H  | -2.456896 | 1.069625  | 0.597806  |
| H  | -0.939551 | 0.056757  | 2.025875  |
| H  | 1.186318  | 0.301188  | 3.237341  |
| H  | 3.320950  | 0.125770  | 2.012358  |
| Li | 5.359239  | -0.358220 | 0.448059  |
| H  | 4.596389  | -0.309230 | -2.539891 |
| H  | 2.592552  | 0.181583  | -3.793409 |

### Compound 5d

|                                              |                             |
|----------------------------------------------|-----------------------------|
| Zero-point correction=                       | 0.271160 (Hartree/Particle) |
| Thermal correction to Energy=                | 0.288222                    |
| Thermal correction to Enthalpy=              | 0.289166                    |
| Thermal correction to Gibbs Free Energy=     | 0.228488                    |
| Sum of electronic and zero-point Energies=   | -667.531604                 |
| Sum of electronic and thermal Energies=      | -667.514543                 |
| Sum of electronic and thermal Enthalpies=    | -667.513598                 |
| Sum of electronic and thermal Free Energies= | -667.574276                 |

-667.8027641

|    |           |           |           |
|----|-----------|-----------|-----------|
| C  | 0.000000  | 0.000000  | 0.000000  |
| C  | 0.000000  | 0.000000  | 1.456436  |
| C  | 1.214598  | 0.000000  | 2.240842  |
| C  | 2.446840  | -0.256352 | 1.529038  |
| C  | 2.429312  | -0.247604 | 0.138994  |
| C  | 1.241860  | -0.073111 | -0.602330 |
| C  | 1.072625  | 0.256377  | 3.656772  |
| C  | -0.201572 | 0.247506  | 4.212603  |
| C  | -1.365691 | 0.072792  | 3.435223  |
| C  | -1.327493 | -0.000187 | 2.055537  |
| N  | 2.203515  | 0.524560  | 4.468442  |
| C  | 2.060443  | 0.378867  | 5.905451  |
| N  | 3.651833  | -0.524238 | 2.225937  |
| C  | 3.651874  | -1.717842 | 3.067761  |
| C  | 4.902790  | -0.378713 | 1.504412  |
| C  | 2.970032  | 1.718690  | 4.122272  |
| Li | -1.543972 | -1.229059 | 0.456147  |
| Li | -1.547489 | 1.228615  | 0.460464  |
| H  | 5.092624  | -1.182835 | 0.771239  |

|   |           |           |           |
|---|-----------|-----------|-----------|
| H | 4.929243  | 0.577614  | 0.979063  |
| H | 5.724083  | -0.394642 | 2.226534  |
| H | 4.439315  | -1.638483 | 3.823009  |
| H | 2.701137  | -1.820994 | 3.581905  |
| H | 3.832456  | -2.630182 | 2.472692  |
| H | 3.048903  | 1.821070  | 3.044222  |
| H | 3.981883  | 1.640577  | 4.530712  |
| H | 2.500577  | 2.630913  | 4.530381  |
| H | 3.056471  | 0.394832  | 6.357024  |
| H | 1.470159  | 1.182863  | 6.380167  |
| H | 1.592578  | -0.577537 | 6.145521  |
| H | -0.314073 | 0.428701  | 5.274668  |
| H | -2.319319 | 0.052333  | 3.961044  |
| H | 1.328910  | -0.052851 | -1.687840 |
| H | 3.351082  | -0.428772 | -0.400439 |

**Compound 5a·TMEDA**

|                                              |                             |
|----------------------------------------------|-----------------------------|
| Zero-point correction=                       | 0.504403 (Hartree/Particle) |
| Thermal correction to Energy=                | 0.532394                    |
| Thermal correction to Enthalpy=              | 0.533338                    |
| Thermal correction to Gibbs Free Energy=     | 0.446424                    |
| Sum of electronic and zero-point Energies=   | -1008.261105                |
| Sum of electronic and thermal Energies=      | -1008.233114                |
| Sum of electronic and thermal Enthalpies=    | -1008.232169                |
| Sum of electronic and thermal Free Energies= | -1008.319084                |

HF=-1008.765508

|    |           |           |           |
|----|-----------|-----------|-----------|
| C  | 3.611826  | 2.478022  | -0.284927 |
| C  | 2.368205  | 1.890125  | -0.635333 |
| C  | 2.082571  | 0.525305  | -0.269479 |
| C  | 3.202318  | -0.259204 | 0.188543  |
| C  | 4.391715  | 0.359787  | 0.533470  |
| C  | 4.584766  | 1.743734  | 0.342775  |
| C  | 0.699945  | 0.116549  | -0.406907 |
| C  | -0.242261 | 0.842779  | -1.120695 |
| C  | 0.188534  | 2.076498  | -1.680890 |
| C  | 1.401683  | 2.636891  | -1.357855 |
| N  | 0.096029  | -0.995870 | 0.368272  |
| C  | 0.024377  | -2.319263 | -0.258178 |
| N  | 3.103296  | -1.690735 | 0.175913  |
| C  | 3.213312  | -2.225516 | -1.186604 |
| C  | 3.978757  | -2.414477 | 1.087629  |
| C  | 0.463280  | -1.077338 | 1.782315  |
| Li | -1.757744 | -0.079947 | -0.136988 |

|   |           |           |           |
|---|-----------|-----------|-----------|
| N | -2.979456 | 0.946306  | 1.330721  |
| C | -3.090787 | 0.250722  | 2.618671  |
| C | -4.270639 | 0.992452  | 0.621777  |
| C | -4.650610 | -0.353967 | 0.001960  |
| N | -3.639058 | -0.844163 | -0.951129 |
| C | -3.719278 | -0.139451 | -2.241260 |
| C | -2.446543 | 2.301978  | 1.535759  |
| C | -3.776107 | -2.289354 | -1.165275 |
| H | -0.190931 | -2.201402 | -1.321641 |
| H | 0.948475  | -2.895247 | -0.142706 |
| H | -0.789931 | -2.896401 | 0.198760  |
| H | -0.290945 | -1.669082 | 2.315507  |
| H | 1.439452  | -1.545205 | 1.950650  |
| H | 0.482216  | -0.073756 | 2.212495  |
| H | 2.521741  | -1.707498 | -1.850146 |
| H | 2.964663  | -3.290962 | -1.187373 |
| H | 4.233706  | -2.109287 | -1.588982 |
| H | 3.661521  | -3.461120 | 1.123945  |
| H | 5.040823  | -2.403319 | 0.787633  |
| H | 3.902293  | -1.997426 | 2.093543  |
| H | 5.219912  | -0.232600 | 0.901961  |
| H | 5.526338  | 2.199323  | 0.629822  |
| H | 3.775725  | 3.523434  | -0.526373 |
| H | 1.654441  | 3.652018  | -1.655528 |
| H | -0.492771 | 2.649418  | -2.310617 |
| H | -1.476892 | 2.240980  | 2.031627  |
| H | -2.292515 | 2.787111  | 0.571681  |
| H | -3.119062 | 2.920295  | 2.152711  |
| H | -2.992012 | -2.633630 | -1.841738 |
| H | -3.667439 | -2.820705 | -0.217265 |
| H | -4.751921 | -2.555949 | -1.603666 |
| H | -2.919884 | -0.488791 | -2.894666 |
| H | -4.692299 | -0.306953 | -2.732848 |
| H | -3.569281 | 0.930953  | -2.104279 |
| H | -2.111706 | 0.214563  | 3.098029  |
| H | -3.794622 | 0.757200  | 3.299965  |
| H | -3.430260 | -0.776830 | 2.477884  |
| H | -5.640124 | -0.260336 | -0.476403 |
| H | -5.084006 | 1.319574  | 1.291852  |
| H | -4.189535 | 1.748536  | -0.162286 |
| H | -4.758013 | -1.103443 | 0.790008  |

Compound (**Sb**·**TMEDA**)<sub>2</sub>

scf done: -2017.559526

|    |           |           |           |
|----|-----------|-----------|-----------|
| C  | 6.169295  | 0.455559  | 0.563603  |
| C  | 4.776342  | 0.107506  | 0.357063  |
| C  | 3.904590  | 0.173660  | 1.498130  |
| C  | 4.443689  | 0.371983  | 2.797863  |
| C  | 5.790146  | 0.544990  | 2.978602  |
| C  | 6.641151  | 0.620407  | 1.858792  |
| C  | 4.160092  | -0.306277 | -0.885078 |
| C  | 2.773889  | -0.394926 | -0.956827 |
| C  | 1.857425  | -0.211818 | 0.126860  |
| C  | 2.497495  | 0.021046  | 1.335308  |
| N  | 4.968533  | -0.637516 | -2.011677 |
| C  | 5.805520  | -1.822421 | -1.849846 |
| N  | 7.045270  | 0.652142  | -0.535188 |
| C  | 6.712607  | 1.769104  | -1.416383 |
| C  | 8.474056  | 0.580615  | -0.285423 |
| C  | 4.356400  | -0.598398 | -3.326179 |
| Li | -0.012673 | -1.432459 | 0.106610  |
| Li | 0.014902  | 1.072411  | 0.247401  |
| C  | -1.849950 | -0.153202 | 0.041525  |
| C  | -2.297096 | 0.226022  | -1.215259 |
| C  | -3.662332 | 0.412740  | -1.574818 |
| C  | -4.698511 | 0.225207  | -0.596398 |
| C  | -4.278852 | -0.334883 | 0.670981  |
| C  | -2.919724 | -0.446962 | 0.945911  |
| C  | -3.996590 | 0.768925  | -2.909074 |
| C  | -5.299998 | 0.980301  | -3.272150 |
| C  | -6.313597 | 0.934506  | -2.295300 |
| C  | -6.044535 | 0.611825  | -0.972127 |
| N  | -7.080637 | 0.685184  | -0.006356 |
| C  | -6.891036 | 1.677754  | 1.048932  |
| N  | -5.249375 | -0.786426 | 1.611751  |
| C  | -6.051662 | -1.926997 | 1.179084  |
| C  | -4.840630 | -0.922877 | 2.996841  |
| C  | -8.452293 | 0.671176  | -0.482858 |
| N  | 0.214302  | -3.174948 | 1.583083  |
| C  | 1.366977  | -3.034140 | 2.483662  |
| C  | 0.427959  | -4.313507 | 0.674278  |
| C  | -0.512705 | -4.306219 | -0.527029 |
| N  | -0.319271 | -3.142752 | -1.410911 |
| C  | -1.492102 | -2.974590 | -2.280997 |
| C  | 0.885542  | -3.298753 | -2.236650 |
| C  | -1.008200 | -3.347199 | 2.375951  |



|   |           |           |           |
|---|-----------|-----------|-----------|
| N | 0.393247  | 2.941771  | -1.068560 |
| C | 1.639690  | 2.819393  | -1.840174 |
| C | 0.521648  | 3.989669  | -0.036437 |
| C | -0.514190 | 3.843327  | 1.076426  |
| N | -0.318579 | 2.629010  | 1.888594  |
| C | -1.527271 | 2.360180  | 2.680243  |
| C | -0.722012 | 3.242459  | -1.978586 |
| C | 0.827950  | 2.776669  | 2.795585  |
| H | -1.581398 | 0.397092  | -2.023806 |
| H | -7.318124 | 1.213914  | -2.583084 |
| H | -5.557272 | 1.234872  | -4.295126 |
| H | -3.195594 | 0.860815  | -3.635825 |
| H | 1.919984  | 0.082565  | 2.259125  |
| H | -9.114421 | 0.506916  | 0.371908  |
| H | -8.767078 | 1.613110  | -0.966797 |
| H | -8.600390 | -0.145715 | -1.191617 |
| H | -7.527284 | 1.432522  | 1.904212  |
| H | -5.858888 | 1.682064  | 1.386382  |
| H | -7.153996 | 2.691366  | 0.698397  |
| H | 7.681493  | 0.867970  | 2.020684  |
| H | 6.204789  | 0.679019  | 3.972399  |
| H | 3.764575  | 0.373612  | 3.644522  |
| H | 8.991099  | 0.527514  | -1.247741 |
| H | 8.877278  | 1.454579  | 0.256764  |
| H | 8.716686  | -0.319233 | 0.282773  |
| H | 7.195337  | 1.629226  | -2.387947 |
| H | 5.639880  | 1.820690  | -1.576228 |
| H | 7.054370  | 2.729903  | -0.992436 |
| H | -5.735882 | -1.051388 | 3.612987  |
| H | -4.183129 | -1.790332 | 3.188112  |
| H | -4.322483 | -0.022056 | 3.331349  |
| H | -6.957616 | -1.995778 | 1.788940  |
| H | -6.351887 | -1.810897 | 0.141352  |
| H | -5.494712 | -2.876448 | 1.279571  |
| H | 6.610571  | -1.813004 | -2.591064 |
| H | 6.257015  | -1.838886 | -0.861549 |
| H | 5.222895  | -2.752115 | -1.984581 |
| H | 5.148382  | -0.641612 | -4.080369 |
| H | 3.667013  | -1.438233 | -3.527587 |
| H | 3.806446  | 0.334449  | -3.463427 |
| H | 2.360568  | -0.670106 | -1.922478 |
| H | -2.657520 | -0.831107 | 1.927080  |
| H | 1.527433  | 3.929398  | 0.383697  |
| H | 0.430543  | 4.992822  | -0.484006 |
| H | -0.493662 | 4.745539  | 1.712588  |

|   |           |           |           |
|---|-----------|-----------|-----------|
| H | -1.514339 | 3.791700  | 0.639284  |
| H | 0.922576  | 1.883963  | 3.413999  |
| H | 1.760974  | 2.886984  | 2.245239  |
| H | 0.702753  | 3.647709  | 3.461421  |
| H | -1.379421 | 1.454305  | 3.271044  |
| H | -1.758123 | 3.189529  | 3.369995  |
| H | -2.379744 | 2.191489  | 2.022207  |
| H | 1.522135  | 2.043110  | -2.596984 |
| H | 1.905089  | 3.764416  | -2.343757 |
| H | 2.454958  | 2.518941  | -1.182499 |
| H | -0.802515 | 2.453404  | -2.727057 |
| H | -1.667616 | 3.274944  | -1.436720 |
| H | -0.575441 | 4.204011  | -2.497721 |
| H | 0.836951  | -4.207029 | -2.861390 |
| H | 0.988220  | -2.434274 | -2.893807 |
| H | 1.780490  | -3.345422 | -1.616498 |
| H | -0.383618 | -5.249616 | -1.086124 |
| H | -1.548796 | -4.291861 | -0.181453 |
| H | 0.309018  | -5.271625 | 1.210451  |
| H | 1.464986  | -4.276334 | 0.333774  |
| H | -1.663155 | -3.861952 | -2.913340 |
| H | -2.379533 | -2.786866 | -1.676487 |
| H | -1.345752 | -2.109460 | -2.928090 |
| H | -1.134797 | -2.487960 | 3.035867  |
| H | -1.885517 | -3.399278 | 1.731680  |
| H | -0.968494 | -4.259562 | 2.995551  |
| H | 1.204862  | -2.194879 | 3.160987  |
| H | 1.524306  | -3.942789 | 3.089339  |
| H | 2.268351  | -2.824886 | 1.908451  |

Compound (**5c**·**TMEDA**)<sub>2</sub>

scf done: -2017.560870

|   |          |           |           |
|---|----------|-----------|-----------|
| C | 5.283589 | 0.677624  | -1.095217 |
| C | 4.303994 | 0.044412  | -0.231402 |
| C | 2.907214 | 0.142169  | -0.599416 |
| C | 2.586725 | 0.622165  | -1.901917 |
| C | 3.552793 | 1.049423  | -2.775851 |
| C | 4.894039 | 1.117461  | -2.352925 |
| C | 1.813435 | -0.219097 | 0.271553  |
| C | 2.219038 | -0.752400 | 1.485723  |
| C | 3.563853 | -1.048612 | 1.808855  |
| C | 4.610356 | -0.699187 | 0.971779  |
| N | 5.942552 | -1.090763 | 1.278607  |

|    |           |           |           |
|----|-----------|-----------|-----------|
| C  | 6.563433  | -2.006307 | 0.324865  |
| N  | 6.621487  | 0.862827  | -0.666361 |
| C  | 6.804308  | 1.687327  | 0.525392  |
| C  | 7.626412  | 1.149804  | -1.673309 |
| C  | 6.232044  | -1.474846 | 2.647914  |
| Li | -0.041303 | -1.372411 | -0.178706 |
| C  | -1.805065 | -0.021958 | -0.314343 |
| C  | -2.938090 | 0.070776  | 0.577217  |
| C  | -4.319039 | 0.101097  | 0.141712  |
| C  | -4.551607 | 0.262310  | -1.278397 |
| C  | -3.470151 | 0.148444  | -2.135213 |
| C  | -2.152077 | -0.036622 | -1.656794 |
| C  | -5.355106 | -0.030769 | 1.149214  |
| C  | -5.013983 | 0.055813  | 2.492023  |
| C  | -3.674663 | 0.172946  | 2.907275  |
| C  | -2.670329 | 0.131709  | 1.974732  |
| N  | -6.704508 | -0.266624 | 0.782098  |
| C  | -7.736135 | 0.009540  | 1.764735  |
| N  | -5.846761 | 0.553537  | -1.789211 |
| C  | -6.086298 | 0.301350  | -3.198174 |
| C  | -6.962227 | -1.514128 | 0.067222  |
| C  | -6.414670 | 1.832514  | -1.371652 |
| Li | 0.039102  | 1.162246  | 0.226232  |
| H  | -1.630350 | 0.131089  | 2.281650  |
| H  | -3.448762 | 0.232010  | 3.967406  |
| H  | -5.784018 | -0.027786 | 3.247239  |
| H  | -3.625342 | 0.257585  | -3.202689 |
| H  | -1.376689 | -0.122914 | -2.420756 |
| H  | 1.477133  | -1.015445 | 2.242451  |
| H  | 3.771534  | -1.600281 | 2.718892  |
| H  | 1.539554  | 0.632067  | -2.183973 |
| H  | 3.290591  | 1.392652  | -3.771729 |
| H  | 5.620217  | 1.574910  | -3.011426 |
| H  | -7.499175 | 1.820140  | -1.516042 |
| H  | -6.216936 | 2.012443  | -0.318612 |
| H  | -5.996902 | 2.671597  | -1.956366 |
| H  | -7.162552 | 0.361446  | -3.384742 |
| H  | -5.594561 | 1.025954  | -3.872379 |
| H  | -5.747906 | -0.700943 | -3.467978 |
| H  | -8.707206 | -0.003311 | 1.261634  |
| H  | -7.781403 | -0.728874 | 2.585485  |
| H  | -7.591515 | 0.999848  | 2.200781  |
| H  | -7.900905 | -1.435048 | -0.488740 |
| H  | -6.165980 | -1.719007 | -0.642508 |
| H  | -7.041233 | -2.366651 | 0.764673  |

|   |           |           |           |
|---|-----------|-----------|-----------|
| H | 7.650260  | -1.987985 | 0.449377  |
| H | 6.215104  | -3.044052 | 0.474171  |
| H | 6.335435  | -1.708537 | -0.694896 |
| H | 7.317213  | -1.538516 | 2.769908  |
| H | 5.853834  | -0.722184 | 3.342477  |
| H | 5.810252  | -2.454961 | 2.935723  |
| H | 8.614637  | 1.048358  | -1.216192 |
| H | 7.556608  | 0.435941  | -2.496219 |
| H | 7.559169  | 2.170360  | -2.091229 |
| H | 7.774171  | 1.468458  | 0.981125  |
| H | 6.771010  | 2.762859  | 0.277431  |
| H | 6.031584  | 1.476098  | 1.258489  |
| N | -0.720531 | -3.300329 | 0.941883  |
| C | -0.077051 | -4.375173 | 0.169196  |
| C | -0.159912 | -4.158885 | -1.339742 |
| H | 0.969881  | -4.428586 | 0.475921  |
| H | -0.526419 | -5.355055 | 0.409240  |
| N | 0.533683  | -2.940348 | -1.787768 |
| H | 0.247943  | -5.051535 | -1.846257 |
| H | -1.206233 | -4.080136 | -1.643537 |
| C | 1.994199  | -3.115745 | -1.744696 |
| C | 0.124588  | -2.604817 | -3.157314 |
| H | 0.631280  | -1.691990 | -3.475310 |
| H | 0.378926  | -3.405824 | -3.872215 |
| H | -0.952270 | -2.432856 | -3.192968 |
| H | 2.479721  | -2.213046 | -2.112024 |
| H | 2.337465  | -3.272380 | -0.722376 |
| H | 2.312637  | -3.972023 | -2.363619 |
| C | -2.186664 | -3.388799 | 0.853815  |
| C | -0.315000 | -3.380740 | 2.350220  |
| H | -2.635637 | -2.596021 | 1.450013  |
| H | -2.522812 | -3.250483 | -0.173283 |
| H | -2.551403 | -4.364168 | 1.219138  |
| H | -0.774991 | -2.563658 | 2.909026  |
| H | -0.624507 | -4.332203 | 2.815377  |
| H | 0.769066  | -3.289192 | 2.431093  |
| N | -0.457959 | 3.226124  | -0.740859 |
| C | -0.008244 | 3.331536  | -2.134648 |
| C | -1.916786 | 3.410818  | -0.685862 |
| C | 0.231969  | 4.224227  | 0.091621  |
| C | 0.087496  | 3.955027  | 1.587793  |
| H | 1.289090  | 4.219090  | -0.183505 |
| H | -0.143236 | 5.240903  | -0.121290 |
| N | 0.675618  | 2.670340  | 1.996469  |
| H | 0.544951  | 4.793541  | 2.142512  |

|   |           |          |           |
|---|-----------|----------|-----------|
| H | -0.970187 | 3.944317 | 1.860463  |
| C | 2.143995  | 2.746228 | 2.017847  |
| C | 0.190786  | 2.285437 | 3.326189  |
| H | 0.607673  | 1.313279 | 3.596954  |
| H | 0.484905  | 3.012970 | 4.102396  |
| H | -0.897610 | 2.206945 | 3.318969  |
| H | 2.555001  | 1.781526 | 2.310704  |
| H | 2.535608  | 2.975070 | 1.027203  |
| H | 2.493328  | 3.520337 | 2.723078  |
| H | -2.203344 | 4.423078 | -1.019008 |
| H | -2.401459 | 2.673803 | -1.323642 |
| H | -2.290117 | 3.256899 | 0.326178  |
| H | -0.235817 | 4.320347 | -2.568300 |
| H | 1.068119  | 3.162461 | -2.194636 |
| H | -0.511883 | 2.571955 | -2.735446 |

Compound **5d**·(TMEDA)<sub>2</sub>

scf done: -1363.559376

|    |           |           |           |
|----|-----------|-----------|-----------|
| C  | 0.116471  | 0.702705  | 1.410325  |
| C  | 0.451646  | -0.059692 | 0.220008  |
| C  | 1.527620  | -1.033672 | 0.180567  |
| C  | 2.417228  | -1.067608 | 1.319114  |
| C  | 2.081444  | -0.333789 | 2.449538  |
| C  | 0.933114  | 0.487559  | 2.506181  |
| C  | 1.614005  | -1.862208 | -1.002025 |
| C  | 0.832877  | -1.534072 | -2.102512 |
| C  | -0.097160 | -0.469295 | -2.080215 |
| C  | -0.371696 | 0.257436  | -0.935725 |
| N  | 2.468085  | -3.000822 | -1.044141 |
| C  | 2.809435  | -3.542269 | -2.345947 |
| N  | 3.633086  | -1.814678 | 1.287720  |
| C  | 4.624213  | -1.346971 | 0.324934  |
| C  | 4.246960  | -2.152689 | 2.558640  |
| C  | 2.149141  | -4.061082 | -0.092306 |
| Li | -0.018181 | 2.215849  | -0.121153 |
| N  | -0.903563 | 4.197767  | -0.397487 |
| C  | -1.797217 | 4.608722  | 0.691236  |
| C  | 0.281239  | 5.074462  | -0.458490 |
| C  | 1.434610  | 4.451235  | -1.247183 |
| N  | 1.847743  | 3.151858  | -0.696301 |
| C  | 2.670348  | 3.302634  | 0.513064  |
| C  | -1.635224 | 4.179680  | -1.671369 |
| C  | 2.571018  | 2.353131  | -1.696154 |

|    |           |           |           |
|----|-----------|-----------|-----------|
| Li | -1.753794 | 0.450231  | 0.589005  |
| N  | -3.638397 | -0.118505 | 1.280980  |
| C  | -4.598134 | -0.509996 | 0.222795  |
| C  | -4.025083 | -1.406802 | -0.880753 |
| N  | -3.792362 | -2.802844 | -0.507313 |
| C  | -5.027774 | -3.565295 | -0.386866 |
| C  | -3.353886 | -1.228901 | 2.214553  |
| C  | -4.170960 | 1.023887  | 2.040024  |
| C  | -2.863502 | -3.450925 | -1.429961 |
| H  | 4.722677  | -1.295595 | 3.070083  |
| H  | 3.506101  | -2.584117 | 3.234496  |
| H  | 5.026669  | -2.899782 | 2.381629  |
| H  | 5.378538  | -2.123473 | 0.164536  |
| H  | 4.153384  | -1.135545 | -0.631408 |
| H  | 5.139030  | -0.434673 | 0.679454  |
| H  | 1.889213  | -3.638540 | 0.873980  |
| H  | 3.019918  | -4.709835 | 0.043467  |
| H  | 1.305771  | -4.682234 | -0.444938 |
| H  | 3.627281  | -4.258532 | -2.222115 |
| H  | 1.977241  | -4.074942 | -2.841918 |
| H  | 3.149837  | -2.746920 | -3.012098 |
| H  | 0.900716  | -2.141730 | -2.997937 |
| H  | -0.643712 | -0.273856 | -3.004557 |
| H  | 0.738315  | 0.998453  | 3.450363  |
| H  | 2.741059  | -0.360694 | 3.309798  |
| H  | 0.029733  | 6.054537  | -0.898652 |
| H  | 0.601768  | 5.266848  | 0.568179  |
| H  | 2.274531  | 5.166431  | -1.275680 |
| H  | 1.128376  | 4.292814  | -2.283988 |
| H  | -2.019458 | 5.179000  | -1.936558 |
| H  | -0.994092 | 3.825787  | -2.478833 |
| H  | -2.474395 | 3.486550  | -1.597827 |
| H  | -2.174283 | 5.636239  | 0.556326  |
| H  | -2.653776 | 3.933348  | 0.734957  |
| H  | -1.271958 | 4.548175  | 1.645931  |
| H  | 2.814223  | 1.378902  | -1.271618 |
| H  | 1.935827  | 2.185684  | -2.566995 |
| H  | 3.503795  | 2.844927  | -2.018849 |
| H  | 2.888288  | 2.318067  | 0.927470  |
| H  | 3.618427  | 3.822656  | 0.295520  |
| H  | 2.133152  | 3.865938  | 1.277155  |
| H  | -5.496603 | -0.959433 | 0.675787  |
| H  | -4.926652 | 0.413100  | -0.264104 |
| H  | -4.258411 | -1.516223 | 2.775440  |
| H  | -3.002239 | -2.093851 | 1.656005  |

|   |           |           |           |
|---|-----------|-----------|-----------|
| H | -2.585536 | -0.913919 | 2.923654  |
| H | -5.120495 | 0.777810  | 2.542534  |
| H | -3.446779 | 1.326021  | 2.799214  |
| H | -4.346685 | 1.870497  | 1.371593  |
| H | -4.712782 | -1.342960 | -1.747761 |
| H | -3.072084 | -0.978854 | -1.206430 |
| H | -4.800639 | -4.583387 | -0.061804 |
| H | -5.689054 | -3.119925 | 0.359028  |
| H | -5.582456 | -3.625594 | -1.343020 |
| H | -2.656210 | -4.467082 | -1.085257 |
| H | -3.263897 | -3.515325 | -2.459221 |
| H | -1.922296 | -2.899556 | -1.461631 |

Compound **5d**·(Et<sub>2</sub>O)<sub>4</sub>

|                                              |                             |
|----------------------------------------------|-----------------------------|
| Zero-point correction=                       | 0.820762 (Hartree/Particle) |
| Thermal correction to Energy=                | 0.871890                    |
| Thermal correction to Enthalpy=              | 0.872834                    |
| Thermal correction to Gibbs Free Energy=     | 0.731380                    |
| Sum of electronic and zero-point Energies=   | -1601.981765                |
| Sum of electronic and thermal Energies=      | -1601.930638                |
| Sum of electronic and thermal Enthalpies=    | -1601.929694                |
| Sum of electronic and thermal Free Energies= | -1602.071148                |

scf done: -1602.802528

|    |           |           |           |
|----|-----------|-----------|-----------|
| C  | 0.128088  | 0.128002  | -1.208026 |
| C  | -0.656093 | 0.028433  | 0.010055  |
| C  | -2.104788 | -0.072108 | 0.014893  |
| C  | -2.779030 | 0.150342  | -1.245698 |
| C  | -2.016330 | 0.236793  | -2.402720 |
| C  | -0.603510 | 0.174647  | -2.382879 |
| C  | -2.732395 | -0.391979 | 1.278021  |
| C  | -1.955681 | -0.380460 | 2.428313  |
| C  | -0.564559 | -0.127203 | 2.399783  |
| C  | 0.144399  | 0.030087  | 1.221130  |
| N  | -4.115883 | -0.738800 | 1.352209  |
| C  | -4.768353 | -0.631462 | 2.643430  |
| N  | -4.197016 | 0.299958  | -1.311556 |
| C  | -4.730718 | 1.472650  | -0.627118 |
| C  | -4.836099 | 0.103791  | -2.598985 |
| C  | -4.482818 | -1.976126 | 0.672860  |
| Li | 1.277135  | 1.407749  | 0.078799  |
| O  | 0.409277  | 3.334104  | 0.033562  |
| C  | -0.233913 | 3.731693  | -1.192548 |

|    |           |           |           |
|----|-----------|-----------|-----------|
| C  | 0.181777  | 5.118186  | -1.670687 |
| C  | -0.076997 | 3.974303  | 1.227044  |
| C  | -1.501172 | 3.593846  | 1.612930  |
| O  | 3.294435  | 2.118869  | 0.199572  |
| C  | 3.543789  | 2.961689  | 1.334194  |
| C  | 3.225717  | 2.207298  | 2.612870  |
| C  | 3.756634  | 2.704034  | -1.027943 |
| C  | 3.656471  | 1.687380  | -2.149722 |
| Li | 1.329776  | -1.271112 | -0.083760 |
| O  | 3.260850  | -1.906108 | -0.040524 |
| C  | 4.225283  | -1.317800 | 0.851373  |
| C  | 4.232925  | -2.006348 | 2.209358  |
| C  | 3.762769  | -2.961507 | -0.874147 |
| C  | 4.447798  | -2.440777 | -2.131710 |
| O  | 0.525937  | -3.179113 | -0.278311 |
| C  | 0.699065  | -4.176607 | 0.739385  |
| C  | -0.303339 | -4.054704 | 1.880638  |
| C  | -0.551632 | -3.427335 | -1.203856 |
| C  | -0.118040 | -4.317929 | -2.361920 |
| H  | 5.217138  | -1.352435 | 0.387060  |
| H  | -4.477604 | -1.421011 | 3.360845  |
| H  | -4.553533 | 0.337523  | 3.098338  |
| H  | -5.850095 | -0.708993 | 2.495687  |
| H  | -5.565070 | -2.002966 | 0.511304  |
| H  | -3.996971 | -2.032322 | -0.297453 |
| H  | -4.200106 | -2.866002 | 1.265872  |
| H  | -4.251141 | 1.597432  | 0.339571  |
| H  | -5.804767 | 1.346181  | -0.458728 |
| H  | -4.581253 | 2.393823  | -1.220971 |
| H  | -5.917043 | 0.029746  | -2.444652 |
| H  | -4.662352 | 0.926820  | -3.316715 |
| H  | -4.490631 | -0.825099 | -3.057126 |
| H  | -2.514579 | 0.397902  | -3.352589 |
| H  | -0.097542 | 0.217366  | -3.349970 |
| H  | -0.050215 | -0.108587 | 3.363154  |
| H  | -2.419710 | -0.614743 | 3.380408  |
| H  | 0.657974  | -5.174712 | 0.285033  |
| H  | 1.714773  | -4.028569 | 1.113259  |
| H  | -1.399729 | -3.864942 | -0.668227 |
| H  | -0.855402 | -2.446119 | -1.566617 |
| H  | 3.940343  | -0.269916 | 0.945254  |
| H  | 4.441920  | -3.595437 | -0.290784 |
| H  | 2.889913  | -3.559126 | -1.138332 |
| H  | -0.056301 | -4.780508 | 2.662257  |
| H  | -0.277296 | -3.050901 | 2.308500  |



|   |           |           |           |
|---|-----------|-----------|-----------|
| H | -1.325304 | -4.256944 | 1.552232  |
| H | -0.957135 | -4.464142 | -3.048830 |
| H | 0.697171  | -3.851535 | -2.920688 |
| H | 0.210797  | -5.305128 | -2.024524 |
| H | 4.763200  | -3.281965 | -2.756798 |
| H | 3.760341  | -1.819685 | -2.709807 |
| H | 5.336935  | -1.848717 | -1.899132 |
| H | 0.049151  | 2.965808  | -1.914640 |
| H | -1.319500 | 3.668176  | -1.077671 |
| H | 0.023587  | 5.061939  | 1.123386  |
| H | 0.611620  | 3.656758  | 2.011675  |
| H | -0.284806 | 5.321134  | -2.639399 |
| H | -0.131729 | 5.909254  | -0.984710 |
| H | 1.265826  | 5.183040  | -1.797169 |
| H | -1.737367 | 4.049726  | 2.579764  |
| H | -2.238572 | 3.956173  | 0.893193  |
| H | -1.600623 | 2.511546  | 1.708136  |
| H | 4.965901  | -1.528841 | 2.867435  |
| H | 3.249782  | -1.928622 | 2.678930  |
| H | 4.499562  | -3.063803 | 2.126547  |
| H | 4.597781  | 3.269693  | 1.318822  |
| H | 2.930281  | 3.867276  | 1.246111  |
| H | 4.795778  | 3.031694  | -0.890212 |
| H | 3.152538  | 3.594513  | -1.245934 |
| H | 3.922368  | 2.161919  | -3.098799 |
| H | 4.340745  | 0.853380  | -1.979812 |
| H | 2.642885  | 1.283378  | -2.227561 |
| H | 3.316260  | 2.881299  | 3.469518  |
| H | 2.212665  | 1.796848  | 2.591554  |
| H | 3.919230  | 1.376404  | 2.760020  |

Compound **11c**

scf done: -1125.961892

|    |           |           |           |
|----|-----------|-----------|-----------|
| C  | -3.783606 | -2.747700 | -1.749477 |
| C  | -4.571549 | -3.025067 | -0.458897 |
| C  | -3.877710 | -2.116180 | 0.564684  |
| O  | -3.242381 | -1.059198 | -0.194017 |
| C  | -3.470239 | -1.262680 | -1.614701 |
| Li | -1.574131 | -0.011625 | 0.160458  |
| O  | -2.155522 | 1.577164  | 1.214588  |
| C  | -3.511181 | 1.991639  | 1.457667  |
| C  | -3.680839 | 3.359003  | 0.755548  |
| C  | -2.241287 | 3.748553  | 0.332341  |

|   |           |           |           |
|---|-----------|-----------|-----------|
| C | -1.362453 | 2.777259  | 1.120145  |
| C | -0.114680 | 0.333260  | -1.238821 |
| C | 0.857483  | -0.115925 | -0.355093 |
| C | 2.249828  | 0.272046  | -0.442577 |
| C | 2.529610  | 1.412487  | -1.278356 |
| C | 1.531995  | 1.884733  | -2.170186 |
| C | 0.298531  | 1.276789  | -2.219122 |
| C | 3.384030  | -0.340757 | 0.203326  |
| C | 4.598781  | 0.321706  | 0.250380  |
| C | 4.796439  | 1.546295  | -0.421702 |
| C | 3.798686  | 2.046759  | -1.217714 |
| N | 3.263959  | -1.682471 | 0.694725  |
| C | 4.192417  | -2.079934 | 1.743838  |
| N | 0.290134  | -0.850469 | 0.798055  |
| C | 0.755025  | -0.460626 | 2.129743  |
| C | 0.120004  | -2.299163 | 0.674600  |
| C | 3.263369  | -2.660897 | -0.399242 |
| H | -0.203512 | -2.537031 | -0.340009 |
| H | 1.036152  | -2.856963 | 0.899214  |
| H | -0.654842 | -2.636722 | 1.374948  |
| H | 0.003642  | -0.758289 | 2.870830  |
| H | 1.710031  | -0.921225 | 2.405235  |
| H | 0.864177  | 0.624067  | 2.175875  |
| H | 2.529813  | -2.380455 | -1.154278 |
| H | 3.002158  | -3.649594 | -0.010575 |
| H | 4.251845  | -2.731082 | -0.883959 |
| H | 3.865384  | -3.038041 | 2.158804  |
| H | 5.230450  | -2.210861 | 1.392343  |
| H | 4.192240  | -1.340180 | 2.546480  |
| H | 5.440265  | -0.130540 | 0.760153  |
| H | 5.758630  | 2.043193  | -0.359357 |
| H | 3.961803  | 2.936373  | -1.817801 |
| H | 1.776341  | 2.724045  | -2.817478 |
| H | -0.409877 | 1.609275  | -2.978508 |
| H | -3.668272 | 2.076990  | 2.539733  |
| H | -4.160944 | 1.209334  | 1.065553  |
| H | -1.150566 | 3.147335  | 2.132132  |
| H | -0.431249 | 2.515366  | 0.620667  |
| H | -4.113941 | 4.091552  | 1.439741  |
| H | -4.341871 | 3.286073  | -0.109402 |
| H | -2.004371 | 4.791124  | 0.551933  |
| H | -2.094269 | 3.584947  | -0.736688 |
| H | -3.099863 | -2.646593 | 1.121793  |
| H | -4.573880 | -1.667905 | 1.278767  |
| H | -4.320523 | -0.643955 | -1.927027 |

|   |           |           |           |
|---|-----------|-----------|-----------|
| H | -2.566411 | -0.929425 | -2.126453 |
| H | -4.351337 | -2.974753 | -2.653647 |
| H | -2.857398 | -3.328612 | -1.771318 |
| H | -4.551086 | -4.073545 | -0.156703 |
| H | -5.617692 | -2.731776 | -0.584701 |
